# Supplementary material for: Induction of Tolerogenic Dendritic Cells by a PEGylated TLR7 Ligand for Treatment of Type 1 Diabetes
Source: PLOS journal article supplement (doi:10.1371/journal.pone.0129867), 2015-06-15
Supplement: S3 (10.1371/journal.pone.0129867.s003) [file journal.pone.0129867.s003]

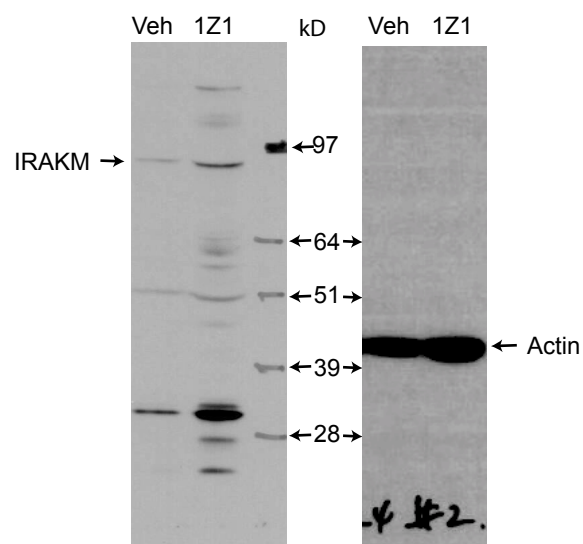

**Supplemental Fig.3. Induction of IRAK-M protein in 1Z1 treated BMDM.** BMDM ( $10^6$ ) were stimulated with 10  $\mu$ M 1Z1 or vehicle overnight. Cell lysates were separated by 4~12% SDS-PAGE gel. After the proteins were transferred onto a PVDF membrane, immunoblot analysis was performed with anti-IRAK-M or anti-actin antibodies.
